## Region-specific and Agent-specific Dilation of Intracerebral Microvessels by Volatile Anesthetics in Rat Brain Slices

Neil E. Farber, M.D., Ph.D.,\* Christopher P. Harkin, M.D.,† Jennifer Niedfeldt, M.D.,‡  
Antal G. Hudetz, B.M.D., Ph.D.,§ John P. Kampine, M.D., Ph.D.,|| William T. Schmeling, M.D., Ph.D.¶

**Background:** Volatile anesthetics are potent cerebral vasodilators. Although the predominant site of cerebrovascular resistance is attributed to intracerebral arterioles, no studies have compared the actions of volatile anesthetics on intraparenchymal microvessels. The authors compared the effects of halothane and isoflurane on intracerebral arteriolar responsiveness in hippocampal and neocortical microvessels using a brain slice preparation.

**Method:** After Institutional Review Board approval, hippocampal or neocortical brain slices were prepared from anesthetized Sprague-Dawley rats and placed in a perfusion-recording chamber, superfused with artificial cerebrospinal fluid. Arteriolar diameters were monitored with videomicroscopy before, during, and after halothane or isoflurane were equilibrated in the perfusate. PGF<sub>2α</sub> precontracted vessels before anesthetic administration. A blinded observer using a computerized videomicrometer analyzed diameter changes.

**Results:** Baseline microvessel diameter and the degree of

precontraction were not different between groups. In the hippocampus, the volatile agents produced similar, concentration-dependent dilation (expressed as percent of precontracted control  $\pm$  SEM) of  $68 \pm 6\%$  and  $79 \pm 9\%$  (1 MAC) and  $120 \pm 3\%$  and  $109 \pm 5\%$  (2 MAC) ( $P < 0.05$ ) during halothane and isoflurane, respectively. In the cerebral cortex, isoflurane caused significantly less vasodilation than did similar MAC levels of halothane ( $84 \pm 9\%$  vs.  $42 \pm 5\%$  dilation at 1 MAC;  $121 \pm 4\%$  vs.  $83 \pm 5\%$  dilation at 2 MAC halothane vs. isoflurane, respectively).

**Conclusion:** Halothane and isoflurane differentially produce dose-dependent dilation of intraparenchymal cerebral microvessels. These findings suggest that local effects of the volatile anesthetics on intracerebral microvessel diameter contribute significantly to alterations in cerebrovascular resistance and support previously described heterogeneous actions on cerebral blood flow produced by these agents. (Key words: Anesthetics, volatile; halothane; isoflurane. Brain: brain slices; hippocampus; neocortex. Cerebral arterioles: vasodilation; microvessel.)

\* Assistant Professor of Anesthesiology and Pharmacology & Toxicology, Director of Pediatric Anesthesiology Research.

† Fellow in Neuroanesthesiology Research, Instructor of Anesthesiology.

‡ Resident in Anesthesiology.

§ Associate Professor of Anesthesiology and Physiology.

|| Professor and Chairman of Anesthesiology, Professor of Physiology.

¶ Professor of Anesthesiology and Pharmacology and Toxicology, Chief, Anesthesiology and Special Care, Zablocki VA Medical Center, Milwaukee, Wisconsin.

Received from the Departments of Anesthesiology, Pharmacology and Toxicology, and Physiology, The Medical College of Wisconsin and Children's Hospital of Wisconsin, Milwaukee, Wisconsin. Submitted for publication May 1, 1997. Accepted for publication July 14, 1997. Supported in part by NIH Anesthesiology Research Training Grants GM 36144 and 08377 and from the Foundation for Anesthesia Education and Research, Ohmeda and the Society for Pediatric Anesthesia Young Investigator Award (NEF), and by NIH RO1 Grant #GM56398-01 (NBF and AGH).

Address reprint requests to Dr. Farber: Medical College of Wisconsin, MEB, 462C Department of Anesthesiology, 8701 Watertown Plank Rd, Milwaukee, Wisconsin 53226. Address electronic mail to: nfarber@post.its.mcw.edu

VOLATILE anesthetics are well-known cerebral arterial vasodilators<sup>1,2</sup> and increase cerebral blood flow (CBF) in many experimental preparations. Halothane and isoflurane relax cerebral arteries *in vivo*<sup>1-3</sup> and in isolated vessel preparations.<sup>4-6</sup> It is generally believed that halothane causes greater increases in CBF than does isoflurane, and thus halothane has potentially greater deleterious effects on intracranial pressure.<sup>1,2</sup> However, recent studies suggest that the effects of volatile anesthetics on regional CBF are heterogeneous despite an essentially uniform depression of regional cerebral metabolism for glucose (CMRGlu) and similar effects on global CBF.<sup>7,8</sup> The net effect of volatile anesthetics on CBF depends on the balance between a direct vasodilatory action and an indirect vasoconstrictive response resulting from metabolic depression.<sup>2,3,8,9</sup> During maximal metabolic suppression, isoflurane produces greater increases in cerebrocortical flow than did halothane.<sup>9,10</sup> Isoflurane may cause preferential dilation of small cerebral vessels as compared with those dilated by halothane.<sup>11</sup> In addition, isoflurane redistributes CBF to sub-



cortical regions, as determined by  $^{14}\text{C}$ -iodoantipyrine autoradiography<sup>7</sup> or single photon emission computer-aided tomography.<sup>12</sup> Volatile anesthetic effects on pial microvessels and regional cerebral perfusion with the use of a closed cranial window<sup>10,13</sup> have provided valuable information, although the preparations are limited to either superficial blood vessels or regional blood flow rather than to specific actions of the anesthetics at the intraparenchymal arteriolar level. This investigation uses an *in vitro* brain slice preparation<sup>14-16</sup> to examine the hypothesis that differences in the hyperemic effect of various volatile anesthetics in specific brain regions are a result of varying degrees of vasodilation of intraparenchymal microvessels that directly regulate capillary perfusion and are the predominant site of cerebrovascular resistance.<sup>17,18</sup> We have recently demonstrated that halothane potently and dose-dependently dilates hippocampal microvessels in this preparation.<sup>19</sup> The purpose of this study was to compare microvascular responsiveness to halothane *versus* isoflurane in two distinct brain regions, the hippocampus and the cerebral neocortex.

## Methods

All experimental procedures and protocols used in this investigation were reviewed and approved by the Animal Use and Care Committee of the Medical College of Wisconsin. Protocols were completed in accordance with the Guiding Principles in the Care and Use of Laboratory Animals of the American Physiological Society and in accordance with National Institutes of Health guidelines.

### General Preparation

Adult male Sprague-Dawley rats (250–350 g body weight, with no significant weight differences between animals in each group) were anesthetized in a specially designed holding chamber by breathing 2% volatilized halothane (Anaquest Inc., Madison, WI) in 100% oxygen. A midline thoracotomy was performed, and 20 ml of buffered saline was infused intracardially into the left ventricle while a right atrial incision was simultaneously made for blood drainage. The animals were then decapitated, and the brains were rapidly removed and rinsed with nutrient medium (artificial cerebrospinal fluid [aCSF]) of the following composition (mM): NaCl, 124; KCl, 5;  $\text{CaCl}_2$ , 2.4;  $\text{MgCl}_2$ , 1.3; glucose, 10;  $\text{KH}_2\text{PO}_4$ , 1.24;  $\text{NaHCO}_3$ , 26; gaseous equilibration with 95%  $\text{O}_2$

and 5%  $\text{CO}_2$ ; pH, 7.4. Nutrient medium was prepared daily, and all measurements of cerebral microvessel diameters were performed on the same day as the tissue slices were prepared.

Brains were cut freehand into blocks containing the hippocampus and somatosensory neocortex, followed by immediate sectioning into coronally oriented tissue slices (250–280- $\mu\text{m}$  thick; at coordinates 2.6–4.2 mm posterior to bregma<sup>20</sup>), with a vibratome mechanical tissue slicer (OTS-3000-03, FHC, Brunswick, ME). Throughout the slicing procedure, tissues were continuously bathed in the oxygenated aCSF at or slightly below room temperature. Subsequently, the slices were transferred to a plexiglass holding chamber and maintained at interface with oxygenated aCSF. Individual slices were then transferred for examination to a recording chamber mounted on an inverted halogen transillumination microscope (Nikon Diaphot 200, Yokohama, Japan).

The recording chamber was designed in this laboratory and consisted of a center recording–superfusion compartment of 2.8 ml. Slices were submerged onto a nylon mesh, allowing continuous superfusion of aCSF under and around the brain slices, with flow through the recording chamber at a rate of 1.5 ml/min. The chamber temperature was continuously monitored and maintained at 34°C using a thermoelectric Peltier heating device coupled to a sensing thermistor. The slices were maintained in this chamber, continuously superfused with the oxygenated aCSF for approximately 1 h before the initiation of the experimental protocol.

### Microscopy

An intraparenchymal arteriole (10–30  $\mu\text{m}$  in diameter) was located within the neuronal tissue, and its diameter was continuously monitored with videomicroscopy. Videomicroscopy equipment consisted of an inverted halogen transillumination microscope, a 40 $\times$  objective (Olympus WPlanFL 160/0, Tokyo, Japan), and a 2.25 $\times$  video projection lens (Nikon CCTV/Microscope Adapter, Yokohama, Japan). Arterioles were microscopically identified and differentiated from venules by the presence and characteristics of the vascular smooth muscle. The image was then transmitted to a video camera (CCD 72, Dage MTI, Michigan City, IN) and displayed on a video monitor (Sony HR Trinitron, Tokyo, Japan). Vessel diameter changes were recorded on videotape using a VHS video recorder (Magnavox, Rebersburg, PA) and analyzed using a video micrometer and computerized imaging analysis (Metamorph Im-



## ANESTHETICS DIFFERENTIALLY ALTER CEREBRAL MICROVESSEL

**Table 1. Baseline Measurements of Microvessel Diameters and aCSF Gases**

| Parameter                   | Halothane         |                    | Isoflurane        |                    |
|-----------------------------|-------------------|--------------------|-------------------|--------------------|
|                             | Hippocampus       | Neocortex          | Hippocampus       | Neocortex          |
| Diameter ( $\mu\text{m}$ )  |                   |                    |                   |                    |
| [range (mean $\pm$ SEM)]    | 9–39 (18 $\pm$ 2) | 11–31 (18 $\pm$ 2) | 9–39 (14 $\pm$ 2) | 10–33 (16 $\pm$ 2) |
| Preconstriction (%)         | 14 $\pm$ 1        | 14 $\pm$ 1         | 14 $\pm$ 1        | 14 $\pm$ 1         |
| pH                          | 7.37 $\pm$ 0.02   | 7.41 $\pm$ 0.01    | 7.35 $\pm$ 0.02   | 7.39 $\pm$ 0.02    |
| P <sub>CO<sub>2</sub></sub> | 39 $\pm$ 2        | 36 $\pm$ 2         | 41 $\pm$ 2        | 37 $\pm$ 1         |
| P <sub>O<sub>2</sub></sub>  | 225 $\pm$ 20      | 230 $\pm$ 10       | 242 $\pm$ 24      | 233 $\pm$ 10       |

Values are mean  $\pm$  SEM. There are no significant differences between groups.

aging System, Universal Imaging Corp., West Chester, PA) using an IBM-compatible computer. Intraluminal diameter of cerebral microvessels was measured on-line and off-line using this computerized measuring system with sensitivity to 0.1  $\mu\text{m}$ .

An intracerebral microvessel was located, and baseline luminal diameter measurements were obtained after the 60-min equilibration period. The aCSF that superfused the brain slices was aerated with a mixture of oxygen, carbon dioxide, and air sufficient to maintain the pH and P<sub>CO<sub>2</sub></sub> within normal limits and the P<sub>O<sub>2</sub></sub> at 220  $\pm$  20 mmHg (table 1). Gas analysis of the superfused fluid was performed at baseline and every 60 min throughout the experimental period using a blood gas analyzer (Radiometer ABL 3, Copenhagen, Denmark).

#### Experimental Protocol

After baseline diameter measurements, PGF<sub>2 $\alpha$</sub> , dissolved in aCSF to a concentration of 500 nM, was superfused over the slice for 30 min. Once a stable precontracted (control) diameter was established, intraluminal diameter measurements were again obtained and recorded, and either halothane or isoflurane was administered during the continuous PGF<sub>2 $\alpha$</sub>  superfusion. Halothane or isoflurane was delivered to the slices by volatilizing the anesthetic agents into the aCSF by passing the oxygen, carbon dioxide, and air mixture through vaporizers (Model F100, Ohio Medical Products; Airco Inc., Madison, WI). Halothane or isoflurane was administered in a graded concentration fashion, in which each slice was exposed to at least three concentrations of volatile anesthetic. The vaporizer dial settings used were 0.5%, 1%, 1.5%, 2%, 3%, and 5%. After introduction of the volatile anesthetic or any change in concentration, 30 min was allowed for equilibration. After volatile anesthetic equilibration, microvessel diameter was again measured and recorded.

In two separate groups of brain slices, experiments were performed to determine the specific effect of precontraction on microvascular responsiveness to isoflurane. 1 MAC and 2 MAC concentrations of isoflurane were administered to hippocampal brain slices, as described previously, in the presence ( $n = 6$ ) and absence ( $n = 9$ ) of precontraction with PGF<sub>2 $\alpha$</sub>  (500 nM). In these experiments only, the percent dilation was calculated by dividing the maximum diameter after dilation by the baseline (nonprecontracted) diameter to avoid biasing calculations in the absence of precontraction.

#### Data Analysis

The average microvessel diameters were derived as an average of 8–13 measurements taken every 6–10  $\mu\text{m}$  along an average of 80  $\mu\text{m}$  of vessel length. The amount of microvessel constriction after PGF<sub>2 $\alpha$</sub>  was calculated using the following equation:  $(D_{\text{BL}} - D_{\text{PGF}})/D_{\text{BL}}$ ; where  $D_{\text{BL}}$  represents the baseline, resting diameter of the microvessel, and  $D_{\text{PGF}}$  represents the control diameter of the microvessel after administration of PGF<sub>2 $\alpha$</sub> . The amount of arteriolar dilation caused by the volatile anesthetics halothane or isoflurane was normalized to the amount of constriction produced by PGF<sub>2 $\alpha$</sub>  and was calculated using the following equations:  $(D_{\text{VA}} - D_{\text{PGF}})/(D_{\text{BL}} - D_{\text{PGF}})$ ; where  $D_{\text{VA}}$  is the diameter of the microvessel after administration of the particular anesthetic used. Brain slices were excluded from analysis if microvessels could not be adequately visualized or if the luminal diameter of the microvessels were not clearly discernible throughout the experiment.

Artificial CSF fluid samples were obtained from the superfusate during each vessel diameter measurement, with the halothane and isoflurane concentrations subsequently measured using gas chromatography (Sigma 3B, Perkin-Elmer, Norwalk, CT). The millimolar concentra-



tions of each volatile anesthetic measured in the bath were then converted to equivalent partial pressures in the solution, calculated as a percentage of the volatile agent in the gas phase,<sup>21</sup> and expressed as MAC values (1 MAC: isoflurane, 1.4%; halothane, 1.1%). The MAC values chosen are commonly accepted for rats and are consistent with those obtained in our laboratory. The reported volatile anesthetic levels are those calculated from the measured concentrations and not the vaporizer dial settings.

### Statistical Analysis

Microvessel diameter changes measured in a series of experiments were averaged for each anesthetic concentration. All raw and normalized data were analyzed by two-way repeated measures analysis of variance (ANOVA) to compare differences within and between groups at multiple anesthetic concentrations. Pairwise comparisons of interventions were performed with contrasts derived from the repeated measures analysis and adjusted for multiplicity by Duncan's modification of the *t* test. Changes in vessel diameter at each concentration of halothane or isoflurane were compared with the microvessel diameter during  $\text{PGF}_{2\alpha}$  precontraction (control) and between anesthetic agents at equi-MAC concentrations. Differences were considered statistically significant when the *P* value is less than 0.05. All data were expressed as mean  $\pm$  SEM.

## Results

One hundred two brain slices were obtained from 75 animals. There was not more than one slice per animal used for an experiment. Twenty-five brain slices completed the protocol with halothane (14 hippocampal, 11 neocortical), and 26 slices completed the protocol with isoflurane (13 hippocampal, 13 neocortical). An additional 16 brain slices from 13 animals were used to determine the influence of precontraction on isoflurane-induced changes in vessel responsiveness. Baseline microvessel diameters were not different between the groups. Administration of the  $\text{PGF}_{2\alpha}$  infusion resulted in a stable cerebral microvessel constriction of 14% from baseline, resting diameter, in all four groups (table 1). This amount of constriction was used to normalize the percent dilation produced by either halothane or isoflurane.

In preliminary experiments, it was determined that even in the absence of  $\text{PGF}_{2\alpha}$ -induced precontric-

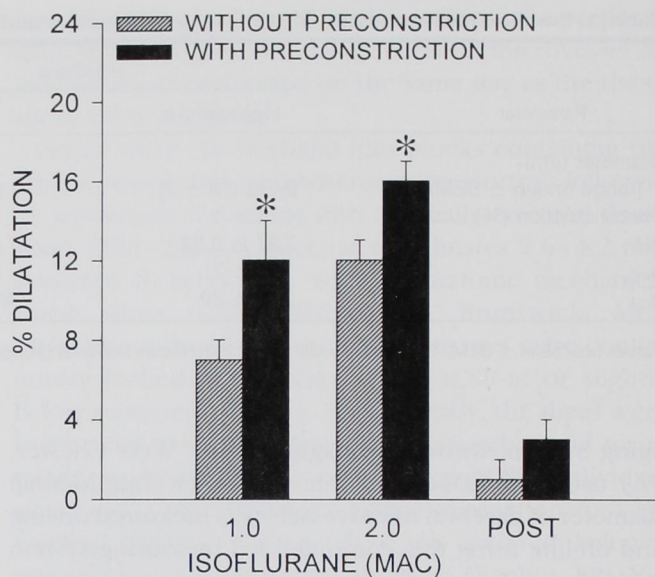

Fig. 1. Percent vasodilation from baseline (before precontraction) of hippocampal microvessels in response to graded MAC levels of isoflurane in the presence and absence of vessel precontraction with  $\text{PGF}_{2\alpha}$ . \**P* < 0.05 versus without precontraction group. All dilation was statistically significant in both groups (*P* < 0.05) compared with baseline.

tion, significant intraparenchymal microvessel dilation occurred during isoflurane. However, the degree of isoflurane-mediated vasodilation was significantly less (7% and 12% dilation from resting diameter at 1.0 and 2.0 MAC, respectively), in the absence of precontraction, than was the response to isoflurane in precontracted vessels (14% and 19% dilation from precontracted diameter at 1.0 and 2.0 MAC, respectively; fig. 1).

Resolution and visualization of cerebral microvessels were excellent in all slices that completed the protocol. Diameter measurements were reproducible and consistent between several independent, blinded observers in preliminary experiments. Experimental duration was typically less than 5 h. It has been previously demonstrated that the duration of slice viability in this preparation is greater than 10 h, with excellent preservation of vascular responsiveness as determined by the vasoconstrictive response to KCl administration.<sup>22</sup>

Halothane and isoflurane diluted, in a concentration-dependent fashion, hippocampal and neocortical microvessels. In the hippocampus (fig. 2A), the volatile agents produced a similar degree of vasodilation at 1 MAC ( $69 \pm 6\%$  and  $79 \pm 9\%$ ) and 2 MAC ( $120$



## ANESTHETICS DIFFERENTIALLY ALTER CEREBRAL MICROVESSEL

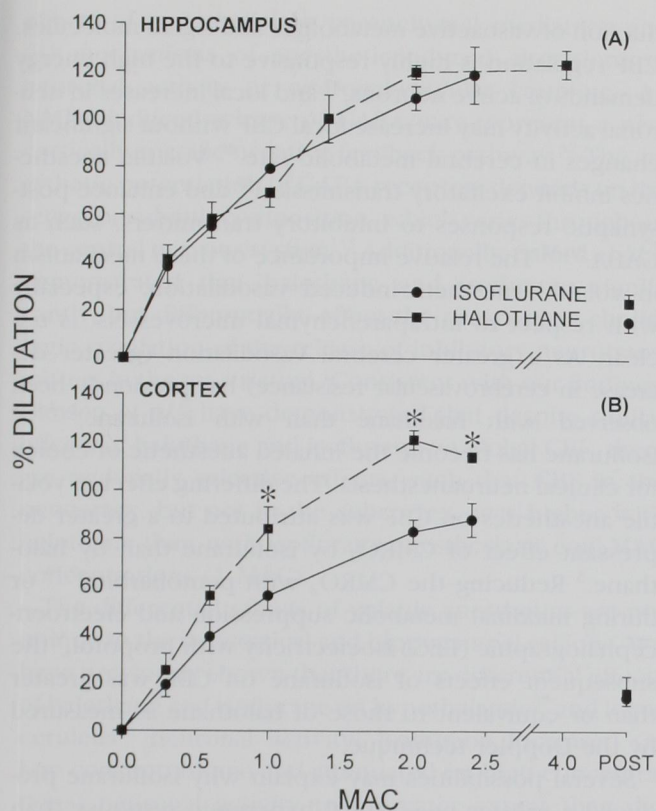

Fig. 2. Percent vasodilation of hippocampal microvessels (A) and neocortical microvessels (B) during various MAC levels (as determined by measured perfusate concentrations) of halothane and isoflurane. The data are normalized to the precontraction produced by  $\text{PGF}_{2\alpha}$ . \* $P < 0.05$  versus halothane treatment. Note the similar dilation of hippocampal vessels by agents and the greater dilation of neocortical vessels by halothane.

$\pm 3\%$  and  $110 \pm 5\%$ ) of halothane and isoflurane, respectively. There were no significant differences in the degree of dilation achieved between the two agents at any concentration. After discontinuation of the volatile agent administration, measured bath concentrations of halothane were  $0.08 \pm 0.02$  mm and of isoflurane,  $0.07 \pm 0.01$  mm, which corresponded to 0.2 MAC of each agent. Hippocampal microvessels were dilated to  $24 \pm 4\%$  (halothane) and  $16 \pm 4\%$  (isoflurane) at this time ( $P$  was not significant between groups).

However, in the neocortex (fig. 2B), halothane, at concentrations above 0.6 MAC, caused significantly greater vasodilation than did equi-MAC levels of isoflurane ( $84 \pm 9\%$  vs.  $56 \pm 6\%$  dilation at 1 MAC;  $121 \pm 4\%$  vs.  $83 \pm 5\%$  dilation at 2 MAC halothane vs. isoflurane, respectively). After discontinuation of the anesthetics, measured bath concentrations of

halothane corresponded to 0.2 MAC, and isoflurane corresponded to 0.1 MAC; cortical microvessels were dilated to  $16 \pm 7\%$  (halothane) and  $14 \pm 3\%$  (isoflurane) ( $P$  was not significant between groups).

Examining the previous data in an alternate fashion (by anesthetic agent rather than by region), halothane-induced microvessel dilation was similar in hippocampal and neocortical microvessels ( $58 \pm 7\%$  and  $120 \pm 3\%$  in the hippocampus and  $56 \pm 4\%$  and  $121 \pm 4\%$  in the neocortex, at 0.6 and 2.0 MAC halothane, respectively) (fig. 3A). Isoflurane-mediated dilation was significantly more profound in hippocampal microvessels compared with effects in neocortical microvessels ( $38 \pm 7\%$  and  $109 \pm 5\%$  in the hippocampus and  $19 \pm 5\%$  and  $83 \pm 5\%$  in the neocortex, at 0.3 and 2.0 MAC isoflurane, respectively; fig. 3B).

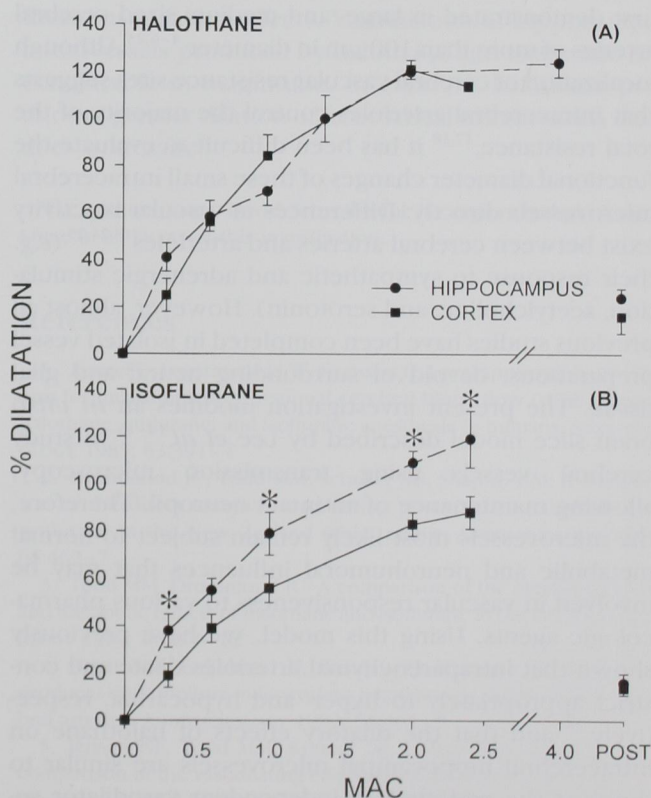

Fig. 3. Percent vasodilation of hippocampal and neocortical microvessels during various MAC levels (as determined by measured perfusate concentrations) of halothane (A) and isoflurane (B). The data are normalized to the precontraction produced by  $\text{PGF}_{2\alpha}$ . \* $P < 0.05$  versus cortical vascular response. Note the region-independent dilation by halothane and the greater dilation of hippocampal vessels compared with neocortical vessels by isoflurane.



## Discussion

Halothane and isoflurane are effective cerebral arterial dilators in humans<sup>1,9,12</sup> and animals.<sup>2-5</sup> The present investigation compares, for the first time, the local vasodilation of intracerebral microvessels by these two anesthetics. The anesthetic-induced dilation, in addition to being potent and concentration-dependent, was agent- and region-specific. Although the effects of these agents were similar in hippocampal vessels, isoflurane was a less potent vasodilator than halothane in the cerebral cortex and was less potent at dilating cortical compared with hippocampal microvessels. These findings suggest that effects on intracerebral arterioles contribute to alterations in cerebrovascular resistance and flow produced by volatile anesthetics and are consistent with their previously ascribed regional heterogeneity in cerebral hyperemia.

The ability of halothane to dilate cerebral vessels was first demonstrated in large- and medium-sized cerebral arteries of more than 100  $\mu\text{m}$  in diameter.<sup>4-6,23</sup> Although localization of cerebral vascular resistance sites suggests that intracerebral arterioles control the majority of the total resistance,<sup>17,18</sup> it has been difficult to evaluate the functional diameter changes of these small intracerebral microvessels directly. Differences in vascular reactivity exist between cerebral arteries and arterioles<sup>18,24,25</sup> (e.g., their response to sympathetic and adrenergic stimulation, acetylcholine, and serotonin). However, almost all previous studies have been completed in isolated vessel preparations, devoid of surrounding neural and glial tissue. The present investigation modifies an *in vitro* brain slice model described by Lee *et al.*<sup>14-16</sup> to study cerebral vessels using transmission microscopy, allowing maintenance of an intact neuropil. Therefore, the microvessels most likely remain subject to normal metabolic and neurohumoral influences that may be involved in vascular responsiveness to various pharmacologic agents. Using this model, we have previously shown that intraparenchymal arterioles dilate and constrict appropriately to hyper- and hypocarbica, respectively,<sup>26</sup> and that the dilatory effects of halothane on intracerebral hippocampal microvessels are similar to those of the endothelium-independent vasodilator sodium nitroprusside.<sup>19</sup>

The overall effect of volatile agents on the cerebral vasculature represents a balance between the direct, relaxing effects on vascular smooth muscle and a depression of spontaneous neuronal activity-cerebral metabolic rate, and the consequent changes in the pro-

duction of vasoactive metabolites and signal molecules. CBF regulation is highly responsive to the high energy demands of active neurons,<sup>27</sup> and local increases in neuronal activity may increase local CBF without significant changes in cerebral metabolic rate.<sup>28</sup> Volatile anesthetics inhibit excitatory transmission<sup>29</sup> and enhance post-synaptic responses to inhibitory transmitters, such as GABA.<sup>30,31</sup> The relative importance of these mechanism in volatile anesthetic-induced vasodilation, especially with respect to intraparenchymal microvessels, is unclear. As a greater cerebral vasodilation (greater decrease in cerebrovascular resistance) has previously been observed with halothane than with isoflurane,<sup>1-3,5,7,8</sup> isoflurane has become the inhaled anesthetic of choice for clinical neuroanesthesia. The differing effect of volatile anesthetics on CBF was attributed to a greater depressant effect of  $\text{CMRO}_2$  by isoflurane than by halothane.<sup>3</sup> Reducing the  $\text{CMRO}_2$  with pentobarbital<sup>2,10</sup> or during maximal metabolic suppression and electroencephalographic (EEG) isoelectricity with propofol,<sup>9</sup> the subsequent effects of isoflurane on CBF was greater than or equivalent to those of halothane as measured by the Doppler technique.

Several possibilities may explain why isoflurane produced a greater neocortical hyperemic response than did halothane. First, the direct vasodilatory effects of the anesthetics may have been unmasked by the metabolic and functional depressant effect of the baseline barbiturate anesthesia.<sup>10</sup> Second, CBF was evaluated by laser Doppler flowmetry, which measures nondirectional perfusion by erythrocytes rather than by whole blood, and reflects flow in capillaries, arterioles, and venules of a small volume of superficial cortical tissue. The reasons for the discrepant results are unclear but may be related to the measurement of erythrocyte flow *versus* brain blood flow, the study of microvessels *versus* larger cerebral arteries, or as discussed previously, the potentially confounding effects of administration of a baseline barbiturate anesthetic. Our brain slice preparation specifically investigates the intraparenchymal arterioles that appear to respond in a manner similar to that of regional blood flow as described in previous *in vivo* studies in the absence of baseline anesthetics and metabolic suppression.<sup>3,7,8</sup> Because the vessels that we are studying are nonpressurized and nonperfused, this may have an impact on findings in this preparation.

The cause for regional differences in anesthetic-mediated vasodilation as observed in the present study is unclear, but may be related to (1) the sensitivity of the cellular mechanism(s) of vasorelaxation; (2) differential



effects of endothelial or parenchymal mediators; and (3) mechanisms of anesthetic-induced alterations of neuronal activity or neuronal-vascular coupling. An NMDA-induced release of GABA may represent a neocortically specific negative feedback pathway.<sup>32</sup> The anesthetic potentiation of GABA receptors depends on the receptor subunit composition, which varies throughout the central nervous system.<sup>33</sup> Additionally, Salord *et al.*<sup>34</sup> demonstrated that halothane and isoflurane significantly, but differentially, affect the presynaptic cholinergic regulation of the release of inhibitory neurotransmitters in the rat striatum. Consistent with our findings, Hansen *et al.*<sup>8</sup> have demonstrated that despite similar effects of halothane and isoflurane on global CBF, there are regionally selective effects, such that CBF in the neocortex, but not in the subcortex, was higher with halothane than with isoflurane anesthesia at equi-MAC concentrations (1 MAC).

The differential effects of volatile anesthetics are not unique to the neocortical and hippocampal regions. We have previously shown that there are differential effects of halothane and isoflurane on hypothalamic<sup>35</sup> and locus ceruleus<sup>36</sup> neuronal activity. Isoflurane increased (at low concentrations) and attenuated (at high concentrations) neuronal activity to a greater extent than did equivalent concentrations of halothane.<sup>36</sup>

Although the mechanisms of anesthetic-induced dilation of intracerebral microvessels have not been examined, Koenig *et al.*<sup>37</sup> used a closed cranial window with microscopy to assess the effects of volatile anesthetics on pial microvessels. Halothane<sup>37</sup> and isoflurane<sup>38</sup> produced nitric oxide-dependent dilation of pial arterioles. Additionally, nitric oxide may have a permissive role in halothane-induced cerebral hyperemia.<sup>13</sup> In large cerebral arteries, volatile anesthetic-induced vasodilation may be mediated, in part, by increases in cGMP levels<sup>6</sup> and vasodilatory prostanoids.<sup>39</sup> Whether there are regional variances in modulators of anesthetic-induced dilation or differences in the mechanism(s) by which volatile agents dilate these intraparenchymal microvessels is unknown and will be the subject of future investigations.

During the present experiments, the endogenous vasoconstrictor,  $\text{PGF}_{2\alpha}$  was used to provide a physiologic baseline; myogenic tone and the vasodilatory responses were normalized to the amount of precontraction. This method of calculation relies on the presence of very similar baseline vessel diameters and amount of precontraction because the small diameters and diameter changes involved may otherwise result in significant

errors. When using  $\text{PGF}_{2\alpha}$  for precontraction, physiologic vasodilatory effects to such factors as hypercarbia remain preserved.<sup>26</sup> Additionally, in previous isolated vessel experiments and in this brain slice preparation, vasodilatory responses to known vasoactive agents are best observed in the presence of precontraction. The present results suggest that isoflurane produces dose-dependent increases in cerebral microvessel diameter in the presence and in the absence of precontraction with  $\text{PGF}_{2\alpha}$ . The responses were qualitatively similar, but the degree of dilation was greater after precontraction. Isoflurane also significantly vasodilates intraparenchymal microvessels after a different precontraction method, with the pharmacologic vasoconstrictor, KCl.<sup>22</sup>

In conclusion, the present study demonstrates that halothane and isoflurane are potent and concentration-dependent dilators of intraparenchymal microvessels. There is regional and agent-specific heterogeneity in these vasodilatory effects. Vasodilation of hippocampal microvessels produced by halothane and isoflurane are comparable in magnitude. In contrast, halothane produces a greater dilation of neocortical microvessels than does isoflurane.

The authors thank David Schwabe for his expert technical assistance in all facets of this investigation.

## References

1. Eintrei C, Lescznewski W, Carlsson C: Local application of  $^{133}\text{Xe}$  for measurement of regional cerebral blood flow (rCBF) during halothane, enflurane, and isoflurane anesthesia in humans. *ANESTHESIOLOGY* 1985; 63:391-4
2. Drummond JC, Todd MM, Scheller MS, Shapiro HM: A comparison of the direct cerebral vasodilating potencies of halothane and isoflurane in the New Zealand white rabbit. *ANESTHESIOLOGY* 1986; 65:462-7
3. Todd MM, Drummond JC: A comparison of the cerebrovascular and metabolic effects of halothane and isoflurane in the cat. *ANESTHESIOLOGY* 1984; 60:276-82
4. Flynn NM, Buljubasic N, Bosnjak ZJ, Kampine JP: Isoflurane produces endothelium-independent relaxation in canine middle cerebral arteries. *ANESTHESIOLOGY* 1992; 76:461-7
5. Jensen NF, Todd MM, Kramer DJ, Leonard PA, Warner DS: A comparison of the vasodilating effects of halothane and isoflurane on the isolated rabbit basilar artery with and without intact endothelium. *ANESTHESIOLOGY* 1992; 76:624-34
6. Eskinder H, Hillard CJ, Flynn N, Bosnjak ZJ, Kampine JP: Role of guanylate cyclase-cGMP systems in halothane-induced vasodilation in canine cerebral arteries. *ANESTHESIOLOGY* 1992; 77:482-7
7. Hansen TD, Warner DS, Todd MM, Vust LJ, Trawick DC: Distribution of cerebral blood flow during halothane versus isoflurane anesthesia in rats. *ANESTHESIOLOGY* 1988; 69:332-7



8. Hansen TD, Warner DS, Todd MM, Vust LJ, Trawick DC: The role of cerebral metabolism in determining the local cerebral blood flow effects on volatile anesthetics: Evidence for persistent flow-metabolism coupling. *J Cereb Flow Metab* 1989; 9:323-8
9. Matta BF, Mayberg TS, Lam AM: Direct cerebrovasodilatory effects of halothane, isoflurane, and desflurane during propofol-induced isoelectric electroencephalogram in humans. *ANESTHESIOLOGY* 1995; 83:980-5
10. Lee JG, Hudetz AG, Smith JJ, Hillard CJ, Bosnjak ZJ, Kampine JP: The effects of halothane and isoflurane on cerebrocortical microcirculation and autoregulation as assessed by laser-Doppler flowmetry. *Anesth Analg* 1994; 79:58-65
11. Gelman S, Fowler KC, Smith LR: Regional blood flow during isoflurane and halothane anesthesia. *Anesth Analg* 1984; 63:557-65
12. Reinstrup P, Ryding E, Algotsson L, Messeter K, Asgeirsson B, Uski T: Distribution of cerebral blood flow during anesthesia with isoflurane or halothane in humans. *ANESTHESIOLOGY* 1995; 82:359-66
13. Faraci FM, Heistad DD, Mayhan WG: Role of large arteries in regulation of blood flow to brain stem in cats. *J Physiol* 1987; 387:115-23
14. Baumbach GL, Heistad DD: Effects of sympathetic stimulation and changes in arterial pressure on segmental resistance of cerebral vessels in rabbits and cats. *Circ Res* 1983; 52:527-33
15. Smith JJ, Hudetz AG, Bosnjak ZJ, Kampine JP: The role of nitric oxide in cerebrocortical laser Doppler flow response to halothane in the rat. *J Neurosurg Anesth* 1995; 7:187-95
16. Sagher O, Zhang X-Q, Szeto W, Thai QA, Jin Y, Kassell NF, Lee KS: Live computerized videomicroscopy of cerebral microvessels in brain slices. *J Cereb Blood Flow Metab* 1993; 13:676-82
17. Jin Y, Sagher O, Thai QA, Kassell NF, Lee KS: The effects of papaverine on phorbol dibutyrate-induced vasoconstriction in brain slice microvessels. *J Neurosurg* 1994; 81:575-8
18. Fergus A, Jin Y, Thai Q-A, Kassell NF, Lee KS: Vasodilatory actions of calcitonin gene-related peptide and nitric oxide in parenchymal microvessels of the rat hippocampus. *Brain Research* 1995; 694:78-84
19. Harkin CP, Hudetz AG, Schmeling WT, Kampine JP, Farber NE: Halothane-induced dilatation of intraparenchymal arterioles in rat brain slices: A comparison to sodium nitroprusside. *ANESTHESIOLOGY* 1997; 86:885-94
20. Pellegrino LJ, Cushman AJ: *A Stereotaxic Atlas of the Rat Brain*. New York, Meridith Publishing Co, 1967, pp 42-53
21. Halsey MJ: Potency and properties of inhalational anaesthetics, *General Anaesthesia, Part 1*. Edited by Nunn JF, Utting JE, Brown BR Jr. London, Butterworths, 1989, pp 7-18
22. Farber NE, Hudetz AG, Schmeling WT, Kampine JP: Direct measurement of cerebral microvessel responsiveness in brain slices. *ANESTHESIOLOGY* 1995; 83(3):A711
23. Eskinder H, Gebremendhin D, Lee JG, Rusch NJ, Supan FD, Kampine JP, Bosnjak ZJ: Halothane and isoflurane decreases the open state probability of K<sup>+</sup> channels in dog cerebral arterial muscle cells. *ANESTHESIOLOGY* 1995; 82:479-90
24. Dacey RG, Duling BR: A study of rat intracerebral arterioles: methods, morphology and reactivity. *Am J Physiol* 1982; 243:H598-H606
25. Dacey RG, Bassett JE: Cholinergic vasodilation of intracerebral arterioles in rats. *Am J Physiol* 1987; 253:H1253-60
26. Harkin CP, Schwabe D, Kampine JP, Schmeling WT, Farber NE: The effects of hyper- and hypocarbia on intraparenchymal arterioles in rat brain slices. *NeuroReport* 1997; 8:1-5
27. Kuschinsky W: Coupling of blood flow and metabolism in the brain, *The Regulation of Cerebral Blood Flow*, Edited by Phillis JW. Boca Raton, FL, CRC Press, 1993.
28. Nakai M, Iadecola C, Ruggiero DA, Tucker LW, Reis DJ: Electrical stimulation of cerebellar fastigial nucleus increases cerebral cortical blood flow without change in local metabolism: Evidence for an intrinsic system in brain for primary vasodilation. *Brain Res* 1983; 260:35-49
29. Perouansky M, Baranov D, Salman M, Yaari Y: Effects of halothane on glutamate receptor-mediated excitatory postsynaptic currents. A patch-clamp study in adult mouse hippocampal slices. *ANESTHESIOLOGY* 1995; 83:109-19
30. Spencer GE, Syed NI, Lukowiak K, Winlow W: Halothane affects both inhibitory and excitatory synaptic transmission at a single identified molluscan synapse, in vivo and in vitro. *Brain Res* 1996; 714:38-48
31. Mody I, Tanelian DL, MacIver MB: Halothane enhances tonic neuronal inhibition by elevating intracellular calcium. *Brain Res* 1991; 538:319-23
32. Ludvig N, Mishra PK, Yan Q, Lasley SM, Burger RL, Jobe PC: The paradoxical effect of NMDA receptor stimulation on electrical activity of the sensorimotor cortex in freely behaving rats: Analysis by combined EEG-intracerebral microdialysis. *Synapse* 1992; 12:87-98
33. Franks NP, Lieb WR: Molecular and cellular mechanisms of general anaesthesia. *Nature* 1994; 367:607-14
34. Salord F, Keita H, Lacharny J-B, Henzel D, Desmonts J-M, Mantz J: Halothane and isoflurane differentially affect the regulation of dopamine and gamma-aminobutyric acid release mediated by presynaptic acetylcholine receptors in the rat striatum. *ANESTHESIOLOGY* 1997; 86:632-41
35. Farber NE, Schmidt JE, Kampine JP, Schmeling WT: Halothane modulates thermosensitive hypothalamic neurons in rat brain slices. *ANESTHESIOLOGY* 1995; 83:1241-53
36. Schmidt JE, Farber NE, Schmeling WT: Halothane and isoflurane differentially effect firing rates of locus coeruleus neurons in rat brain slices. *ANESTHESIOLOGY* 1996; 85:A689
37. Koenig HM, Pelligrino DA, Albrecht RF: Halothane vasodilation and nitric oxide in rat pial vessels. *J Neurosurg Anesth* 1993; 5:264-71
38. Koenig HM, Pelligrino DA, Wang Q, Albrecht RF: Role of nitric oxide and endothelium in rat pial vessel dilation response to isoflurane. *Anesth Analg* 1994; 79:886-91
39. Moore LE, Kirsch JR, Helfaer MA, Tobin JR, McPherson RW, Traystman RJ: Nitric oxide and prostanoids contribute to isoflurane-induced cerebral hyperemia in pigs. *ANESTHESIOLOGY* 1994; 80:1328-37
